# Supplementary material
Source: PubMed Central journal article supplement (PMC2987254)
Supplement: ejhg2009193x1.pdf [file ejhg2009193x1.pdf]

Online – only table

Table 3 (supplementary data) Haplotypes of mutant alleles

|       | DNA markers | Distance from TIE2 (kb) | VM  |    |     |     |    |     |
|-------|-------------|-------------------------|-----|----|-----|-----|----|-----|
|       |             |                         | 22  | 34 | 41  | 56  | 66 | 109 |
|       | D9S171      | 2600                    | 2   | 4  | 1/6 | 1   | 4  | 2   |
|       | D9S126      | 1500                    | 5   | 3  | 3   | 3   | 3  | 3   |
|       | BV724037    | 900                     | 1/2 | -  | 1   | 3   | 2  | 1   |
|       | BV724038    | 450                     | 2   | -  | 1   | 2   | 2  | 1   |
|       | BV724039    | 380                     | 3   | 2  | 3   | 3   | 2  | 3   |
|       | BV724040    | 320                     | 2   | 4  | 1   | 1/3 | 3  | 4   |
| R849W | 2545 C>T    | 0                       |     |    |     |     |    |     |
|       | D9S169      | 80                      | 5   | 5  | 4/5 | 6   | 2  | 5   |
|       | D9S161      | 400                     | 1   | 2  | 1/3 | 3   | 3  | 3   |
|       | D9S104      | 1500                    | 2   | /  | 1   | 3   | 1  | 3   |

Table 3
